# Supplementary material for: Physical rehabilitation interventions for adult patients during critical illness: an overview of systematic reviews
Source: PubMed Central journal article supplement — Thorax. 2016 May 24;71(10):881–90. doi: 10.1136/thoraxjnl-2015-208273 (PMC5036250; doi:10.1136/thoraxjnl-2015-208273), 2016-05-24
Supplement: thoraxjnl-2015-208273supp.pdf [file thoraxjnl-2015-208273supp.pdf]

## Physical rehabilitation interventions for adult patients during critical illness: an overview of systematic reviews

\*Bronwen Connolly<sup>1, 2, 3</sup>, \*Brenda O'Neill<sup>4</sup>, \*Lisa Salisbury<sup>5</sup>, \*Bronagh Blackwood<sup>6</sup> on behalf of the Enhanced Recovery After Critical Illness Programme Group

### ONLINE SUPPLEMENT

#### E1. Systematic review eligibility

Further detail of systematic review eligibility is presented in Table E1.

**Table E1.** Systematic review characteristics for overview eligibility

| Characteristic            | Inclusion                                                                                                                                                                                                                                                                                                                                                                                                                                                                                         | Exclusion                                                                                        |
|---------------------------|---------------------------------------------------------------------------------------------------------------------------------------------------------------------------------------------------------------------------------------------------------------------------------------------------------------------------------------------------------------------------------------------------------------------------------------------------------------------------------------------------|--------------------------------------------------------------------------------------------------|
| <b>Review design</b>      | Systematic reviews of RCTs and/or quasi-RCTs investigating the effect of any physical rehabilitation intervention following critical illness at any stage of the recovery continuum. Where non-RCTs are included, the review will be eligible only if RCT findings are reported separately                                                                                                                                                                                                        | Systematic reviews including only non-RCTs                                                       |
| <b>Participants</b>       | Adult patients ( $\geq 18$ years) admitted to the ICU with critical illness irrespective of causal diagnosis                                                                                                                                                                                                                                                                                                                                                                                      | Studies of short-stay ICU management e.g. post-operative                                         |
| <b>Intervention</b>       | All types of physical rehabilitation interventions including exercise-based treatments and adjunctive strategies e.g. electrical muscle stimulation or cycling                                                                                                                                                                                                                                                                                                                                    | Studies of composite interventions e.g. combined physical and cognitive rehabilitation           |
| <b>Control/comparator</b> | Standard or usual care, or an alternative physical rehabilitation                                                                                                                                                                                                                                                                                                                                                                                                                                 | Studies involving a comparator of the same intervention delivered at a different intensity level |
| <b>Outcome measures</b>   | <p><i>Primary</i></p> <p>Any measure reflecting recovery of any aspect physical function, long-term measures of physical function or its surrogates</p> <p><i>Secondary</i></p> <p>Structure, content and format of rehabilitation interventions;<br/>           Specific patient populations examined;<br/>           Reported rates of adverse events or harmful effects;<br/>           Effect on any other domains of outcomes where examined and reported e.g. health-related quality of</p> | n/a                                                                                              |

|                    |                                                                                       |                                                                                            |
|--------------------|---------------------------------------------------------------------------------------|--------------------------------------------------------------------------------------------|
|                    | life                                                                                  |                                                                                            |
| <b>Publication</b> | No publication date or language restriction will be applied during the initial search | Non-English language studies will be excluded from further review after the initial search |

---

*Abbreviations:* RCT = randomised controlled trial

## **E2. Data sources and search strategies**

Electronic databases (n=6) were searched by one reviewer (BC). Databases were accessed via King's College London, United Kingdom and included the Cochrane Systematic Review Database (October 2015), Database of Abstracts of Reviews of Effectiveness (October 2015), Cochrane Central Register of Controlled Trials (CENTRAL, Issue 10, 2015), Ovid SP Medline (1966 to October 2015), Ovid SP Excerpta Medica Database (EMBASE, 1988 to October 2015), and Cumulative Index to Nursing and Allied Health Literature via EBSCO host (CINAHL, 1982 to October 2015). Additional references were identified by cross-checking reference lists of included articles and searching the personal libraries of the authors.

Search strategies for electronic databases are presented below. Searches were not storable in the DARE database however the search involved terms used the summaries below.

### **Cochrane search strategy (Cochrane)**

- #1 intensive care unit
- #2 intensive care
- #3 ICU
- #4 critical care unit
- #5 critical care
- #6 critically ill
- #7 critical illness
- #8 mechanical ventilation
- #9 #1 or #2 or #3 or #4 or #5 or #6 or #7 or #8
- #10 exercise
- #11 exercise rehabilitation
- #12 physical rehabilitation
- #13 physical therapy
- #14 physiotherapy
- #15 early mobilisation
- #16 physical fitness

- #17 muscle strength
- #18 cycling
- #19 cycle ergometry
- #20 electrical muscle stimulation
- #21 neuromuscular stimulation
- #22 NMES
- #23 #10 OR #11 or #12 or #13 or #14 or #15 or #16 or #17 or #18 or #19 or #20 or #21 or #22
- #24 randomized controlled trial.pt
- #25 controlled clinical trial.pt
- #26 randomized.ab
- #27 randomly.ab
- #28 placebo.ab
- #29 trial.ab
- #30 groups.ab
- #31 #24 or #25 or #26 or #27 or #28 or #29 or #30
- #32 systematic review.pt
- #33 meta-analysis.pt
- #34 #32 or #33
- #35 #9 and #23 and #31 Online Publication Date from Oct 2014 to Mar 2015
- #36 #9 and #23 and #34 Online Publication Date from Oct 2014 to Mar 2015

**MEDLINE search strategy (Ovid SP)**

1. ((intensive or critical) adj1 care unit).mp. [mp=title, abstract, original title, name of substance word, subject heading word, keyword heading word, protocol supplementary concept word, rare disease supplementary concept word, unique identifier]
2. ((intensive or critical) adj1 care).mp. [mp=title, abstract, original title, name of substance word, subject heading word, keyword heading word, protocol supplementary concept word, rare disease supplementary concept word, unique identifier]
3. exp Intensive Care Units/ or exp Intensive Care/ or ICU.mp. or exp Critical Care/
4. critical illness.mp. or exp Critical Illness/
5. mechanical ventilation.mp. or exp Respiration, Artificial/
6. 1 or 2 or 3 or 4 or 5
7. exp Exercise Therapy/ or exercise.mp. or exp Exercise/
8. ((exercise or physical) adj2 rehabilitation).mp. [mp=title, abstract, original title, name of substance

word, subject heading word, keyword heading word, protocol supplementary concept word, rare disease supplementary concept word, unique identifier]

9. physiotherapy.mp.
10. physical therapy.mp.
11. exp Early Ambulation/ or early mobilisation.mp.
12. early mobilization.mp.
13. physical fitness.mp. or exp Physical Fitness/
14. muscle strength.mp. or exp Muscle Strength/
15. cycling.mp.
16. cycle ergometry.mp.
17. exp Electric Stimulation Therapy/ or electrical muscle stimulation.mp.
18. neuromuscular stimulation.mp.
19. NMES.mp.
20. 7 or 8 or 9 or 10 or 11 or 12 or 13 or 14 or 15 or 16 or 17 or 18 or 19
21. randomized controlled trial.pt.
22. controlled clinical trial.pt.
23. randomized.ab.
24. placebo.ab.
25. randomly.ab.
26. trial.ab.
27. groups.ab.
28. 21 or 22 or 23 or 24 or 25 or 26 or 27
29. exp animals/ not humans.sh.
30. 28 not 29
31. Meta-Analysis as Topic/
32. meta analy\$.tw.
33. metaanaly\$.tw.
34. Meta-Analysis/
35. (systematic adj (review\$1 or overview\$1)).tw.
36. exp Review Literature as Topic/
37. or/31-36
38. cochrane.ab.
39. embase.ab.
40. (cinahl or cinhal).ab.

41. science citation index.ab.
42. or/38-41
43. reference list\$.ab.
44. bibliograph\$.ab.
45. hand-search\$.ab.
46. relevant journals.ab.
47. manual search\$.ab.
48. or/43-47
49. selection criteria.ab.
50. data extraction.ab.
51. 49 or 50
52. Review/
53. 51 and 52
54. Comment/
55. Letter/
56. Editorial/
57. animal/
58. human/
59. 57 not (57 and 58)
60. or/54-56,59
61. 37 or 42 or 48 or 53
62. 61 not 60
63. 6 and 20 and 30
64. 6 and 20 and 62

**CINAHL search strategy (EbscoHost)**

- |     |                     |
|-----|---------------------|
| S52 | S10 AND S28 AND S38 |
| S51 | S10 AND S28 AND S38 |
| S50 | S10 AND S28 AND S49 |
| S49 | S43 not S48         |
| S48 | Or/S44-S47          |
| S47 | Animals/            |
| S46 | PT Editorial        |
| S45 | PT Letter           |

S44 PT Commentary

S43 S40 OR S41 OR S42

S42 systematic review/

S41 Literature review/

S40 Meta analysis/

S39 S38 not AB animal\*

S38 S29 OR S30 OR S31 OR S32 OR S33 OR S34 OR S35 OR S36 OR S37

S37 ("Clinical trials") OR ("Randomized controlled trials") OR ("Clinical trial registry") OR ("multicentre studies") OR ("Cochrane library")

S36 ("Clinical trials") OR ("Randomized controlled trials") OR ("Clinical trial registry") OR ("multicentre studies") OR ("Cochrane library")

S35 AB groups

S34 AB trial

S33 AB randomly

S32 AB placebo

S31 AB randomized

S30 TX controlled clinical trial

S29 TX randomized controlled trial

S28 S11 OR S12 OR S13 OR S14 OR S15 OR S16 OR S17 OR S18 OR S19 OR S20 OR S21 OR S22 OR S23 OR S24 OR S25 OR S26 OR S27

S27 (MH "exercise") OR (MH "exercise rehabilitation") OR (MH "physical rehabilitation") OR (MH "physical therapy") OR (MH "physiotherapy") OR (MH "mobilisation") OR (MH "early mobilisation") OR (MH "mobilization") OR (MH "early mobilization") OR (MH "physical fitness") OR (MH "muscle strength") OR (MH "cycling") OR (MH "cycle ergometry") OR (MH "electrical muscle stimulation") OR (MH "neuromuscular stimulation") OR (MH "NMES")

S26 TX NMES

S25 TX neuromuscular stimulation

S24 TX electrical muscle stimulation

S23 TX cycle ergometry

S22 TX cycling

S21 TX muscle strength

S20 TX physical fitness

S19 TX early mobilization

S18 TX mobilization

- S17 TX early mobilization
- S16 TX mobilization
- S15 TX physiotherapy
- S14 TX physical therapy
- S13 TX physical rehabilitation
- S12 TX exercise rehabilitation
- S11 TX exercise
- S10 S1 OR S2 OR S3 OR S4 OR S5 OR S6 OR S7 OR S8 OR S9
- S9 (MH "intensive care unit") OR (MH "intensive care") OR (MH "ICU") OR (MH "critical care unit") OR (MH "critical care") OR (MH "critically ill") OR (MH "critical illness") OR (MH "mechanical ventilation")
- S8 TX mechanical ventilation
- S7 TX critical illness
- S6 TX critically ill
- S5 TX critical care
- S4 TX critical care unit
- S3 TX ICU
- S2 TX intensive care
- S1 TX intensive care unit

**EMBASE search strategy (Ovid SP)**

1. ((intensive or critical) adj1 care unit).mp. [mp=title, abstract, heading word, drug trade name, original title, device manufacturer, drug manufacturer, device trade name, keyword]
2. ((intensive or critical) adj1 care).mp. [mp=title, abstract, heading word, drug trade name, original title, device manufacturer, drug manufacturer, device trade name, keyword]
3. exp intensive care/ or exp intensive care unit/ or ICU.mp.
4. critical illness.mp. or exp critical illness/
5. mechanical ventilation.mp. or exp artificial ventilation/
6. 1 or 2 or 3 or 4 or 5
7. exp exercise/ or exercise.mp.
8. ((exercise or physical) adj2 rehabilitation).mp. [mp=title, abstract, heading word, drug trade name, original title, device manufacturer, drug manufacturer, device trade name, keyword]
9. physiotherapy.mp. or exp physiotherapy/
10. physical therapy.mp.

11. exp mobilization/ or early mobilisation.mp.
12. early mobilization.mp.
13. physical fitness.mp. or exp fitness/
14. muscle strength.mp. or exp muscle strength/
15. cycling.mp. or exp cycling/
16. cycle ergometry.mp.
17. electrical muscle stimulation.mp.
18. exp neuromuscular electrical stimulation/ or neuromuscular stimulation.mp.
19. NMES.mp.
20. 7 or 8 or 9 or 10 or 11 or 12 or 13 or 14 or 15 or 16 or 17 or 18 or 19
21. randomized controlled trial/
22. controlled clinical trial/
23. randomized.ab.
24. placebo.ab.
25. randomly.ab.
26. trial.ab.
27. groups.ab.
28. 21 or 22 or 23 or 24 or 25 or 26 or 27
29. animals/
30. humans/
31. 29 not (29 and 30)
32. 28 not 31
33. exp Meta Analysis/
34. ((meta adj analy\$) or metaanalys\$.tw.
35. (systematic adj (review\$1 or overview\$1)).tw.
36. or/33-35
37. cochrane.ab.
38. embase.ab.
39. (cinahl or cinhal).ab.
40. science citation index.ab.
41. or/37-40
42. reference lists.ab.
43. bibliograph\$.ab.
44. hand-search\$.ab.



45. manual search\$.ab.
46. relevant journals.ab.
47. or/42-46
48. data extraction.ab.
49. selection criteria.ab.
50. 48 or 49
51. review.pt.
52. 50 and 51
53. letter.pt.
54. editorial.pt.
55. animal/
56. human/
57. 55 not (55 and 56)
58. or/53-54,57
59. 36 or 41 or 47 or 52
60. 59 not 58
61. 6 and 20 and 32
62. 6 and 20 and 60

### **E3. Assessment of systematic review eligibility**

A bespoke assessment form of systematic review eligibility for inclusion into the overview was used for documentation of full-text screening and summarised in Table E2.

### **E4. Data extraction of included systematic reviews**

A bespoke data extraction form was developed for independent detailed data extraction from included systematic reviews and summarised in Table E3.

**Table E2.** Systematic review eligibility form

| First author<br>Year | Systematic<br>review design<br><br>(Yes / No /<br>Unclear) | Location of patients<br>included in review<br>(ICU/HDU/ward/<br>post discharge)<br><br>(Yes / No / Unclear<br>and state which) | Relevant physical<br>interventions<br><br>(Yes / No / Unclear) | RCTs/Quasi RCTs<br>only or with a<br>distinct report of<br>synthesis of findings<br>and quality<br><br>(Yes / No / Unclear) | Comparator<br>placebo/usual<br>care/alternative (i.e.<br>not different dose)<br><br>(Yes / No / Unclear) | Additional<br>comments | Include<br><br><br><br><br><br><br>(Yes / No / Unclear) |
|----------------------|------------------------------------------------------------|--------------------------------------------------------------------------------------------------------------------------------|----------------------------------------------------------------|-----------------------------------------------------------------------------------------------------------------------------|----------------------------------------------------------------------------------------------------------|------------------------|---------------------------------------------------------|
|                      |                                                            |                                                                                                                                |                                                                |                                                                                                                             |                                                                                                          |                        |                                                         |

**Table E3.** Data extraction form

| Review ID number<br><br>Title of SR<br><br>Author (year) | Focus/Stage of rehab<br>delivery<br><br>Category of<br>Interventions that<br>the SR included<br><br>Population included<br>and number | Number of included<br>studies<br><br>Search dates including<br>date assessed as up to<br>date<br><br>List references included | Quality tool used;<br>is yes indicate<br>which<br><br>Meta analysis<br>included (y/N) | Population<br><br>Intervention<br><br>Comparator<br><br>Outcomes<br><br>Adverse events | Main/key results<br><br>(list for each<br>outcome;<br>intervention and<br>comparator<br>groups;<br>numbers of<br>participants in<br>each group; effect<br>size (95%CI); risk | Review authors'<br>conclusions |
|----------------------------------------------------------|---------------------------------------------------------------------------------------------------------------------------------------|-------------------------------------------------------------------------------------------------------------------------------|---------------------------------------------------------------------------------------|----------------------------------------------------------------------------------------|------------------------------------------------------------------------------------------------------------------------------------------------------------------------------|--------------------------------|
|                                                          |                                                                                                                                       |                                                                                                                               |                                                                                       |                                                                                        |                                                                                                                                                                              |                                |

### **E5. Assessment of methodological quality of included systematic reviews**

Two review authors (BC and BB) independently assessed the quality of reporting and the methodological quality of included systematic reviews using the Preferred Reporting Items for Systematic Reviews and Meta-analyses (PRISMA) checklist<sup>1</sup> and the Assessment of Multiple Systematic Reviews (AMSTAR) tool<sup>2</sup> (Tables E4 and E5 respectively).

**Table E4.** The PRISMA checklist for systematic review and meta-analysis reporting

| Section/topic             | #  | Checklist item                                                                                                                                                                                                                                                                                              | Reported on page # |
|---------------------------|----|-------------------------------------------------------------------------------------------------------------------------------------------------------------------------------------------------------------------------------------------------------------------------------------------------------------|--------------------|
| <b>TITLE</b>              |    |                                                                                                                                                                                                                                                                                                             |                    |
| Title                     | 1  | Identify the report as a systematic review, meta-analysis, or both.                                                                                                                                                                                                                                         |                    |
| <b>ABSTRACT</b>           |    |                                                                                                                                                                                                                                                                                                             |                    |
| Structured summary        | 2  | Provide a structured summary including, as applicable: background; objectives; data sources; study eligibility criteria, participants, and interventions; study appraisal and synthesis methods; results; limitations; conclusions and implications of key findings; systematic review registration number. |                    |
| <b>INTRODUCTION</b>       |    |                                                                                                                                                                                                                                                                                                             |                    |
| Rationale                 | 3  | Describe the rationale for the review in the context of what is already known.                                                                                                                                                                                                                              |                    |
| Objectives                | 4  | Provide an explicit statement of questions being addressed with reference to participants, interventions, comparisons, outcomes, and study design (PICOS).                                                                                                                                                  |                    |
| <b>METHODS</b>            |    |                                                                                                                                                                                                                                                                                                             |                    |
| Protocol and registration | 5  | Indicate if a review protocol exists, if and where it can be accessed (e.g., Web address), and, if available, provide registration information including registration number.                                                                                                                               |                    |
| Eligibility criteria      | 6  | Specify study characteristics (e.g., PICOS, length of follow-up) and report characteristics (e.g., years considered, language, publication status) used as criteria for eligibility, giving rationale.                                                                                                      |                    |
| Information sources       | 7  | Describe all information sources (e.g., databases with dates of coverage, contact with study authors to identify additional studies) in the search and date last searched.                                                                                                                                  |                    |
| Search                    | 8  | Present full electronic search strategy for at least one database, including any limits used, such that it could be repeated.                                                                                                                                                                               |                    |
| Study selection           | 9  | State the process for selecting studies (i.e., screening, eligibility, included in systematic review, and, if applicable, included in the meta-analysis).                                                                                                                                                   |                    |
| Data collection process   | 10 | Describe method of data extraction from reports (e.g., piloted forms, independently, in duplicate) and any processes for obtaining and confirming data from investigators.                                                                                                                                  |                    |
| Data items                | 11 | List and define all variables for which data were sought (e.g., PICOS, funding sources) and any assumptions and simplifications made.                                                                                                                                                                       |                    |

|                                    |    |                                                                                                                                                                                                                        |  |
|------------------------------------|----|------------------------------------------------------------------------------------------------------------------------------------------------------------------------------------------------------------------------|--|
| Risk of bias in individual studies | 12 | Describe methods used for assessing risk of bias of individual studies (including specification of whether this was done at the study or outcome level), and how this information is to be used in any data synthesis. |  |
| Summary measures                   | 13 | State the principal summary measures (e.g., risk ratio, difference in means).                                                                                                                                          |  |
| Synthesis of results               | 14 | Describe the methods of handling data and combining results of studies, if done, including measures of consistency (e.g., $I^2$ ) for each meta-analysis.                                                              |  |
| Risk of bias across studies        | 15 | Specify any assessment of risk of bias that may affect the cumulative evidence (e.g., publication bias, selective reporting within studies).                                                                           |  |
| Additional analyses                | 16 | Describe methods of additional analyses (e.g., sensitivity or subgroup analyses, meta-regression), if done, indicating which were pre-specified.                                                                       |  |
| <b>RESULTS</b>                     |    |                                                                                                                                                                                                                        |  |
| Study selection                    | 17 | Give numbers of studies screened, assessed for eligibility, and included in the review, with reasons for exclusions at each stage, ideally with a flow diagram.                                                        |  |
| Study characteristics              | 18 | For each study, present characteristics for which data were extracted (e.g., study size, PICOS, follow-up period) and provide the citations.                                                                           |  |
| Risk of bias within studies        | 19 | Present data on risk of bias of each study and, if available, any outcome level assessment (see item 12).                                                                                                              |  |
| Results of individual studies      | 20 | For all outcomes considered (benefits or harms), present, for each study: (a) simple summary data for each intervention group (b) effect estimates and confidence intervals, ideally with a forest plot.               |  |
| Synthesis of results               | 21 | Present results of each meta-analysis done, including confidence intervals and measures of consistency.                                                                                                                |  |
| Risk of bias across studies        | 22 | Present results of any assessment of risk of bias across studies (see Item 15).                                                                                                                                        |  |
| Additional analysis                | 23 | Give results of additional analyses, if done (e.g., sensitivity or subgroup analyses, meta-regression [see Item 16]).                                                                                                  |  |
| <b>DISCUSSION</b>                  |    |                                                                                                                                                                                                                        |  |
| Summary of evidence                | 24 | Summarize the main findings including the strength of evidence for each main outcome; consider their relevance to key groups (e.g., healthcare providers, users, and policy makers).                                   |  |
| Limitations                        | 25 | Discuss limitations at study and outcome level (e.g., risk of bias), and at review-level (e.g., incomplete retrieval of identified research, reporting bias).                                                          |  |
| Conclusions                        | 26 | Provide a general interpretation of the results in the context of other evidence, and implications for future research.                                                                                                |  |
| <b>FUNDING</b>                     |    |                                                                                                                                                                                                                        |  |
| Funding                            | 27 | Describe sources of funding for the systematic review and other support (e.g., supply of data); role of funders for the systematic review.                                                                             |  |

Taken from Liberati *et al*<sup>1</sup>.

**Table E5.** The AMSTAR tool

|                                                                                                                                                                                                                                                                                                                                                                        | YES | NO | ? | N/A |
|------------------------------------------------------------------------------------------------------------------------------------------------------------------------------------------------------------------------------------------------------------------------------------------------------------------------------------------------------------------------|-----|----|---|-----|
| <p><b>1. Was an 'a priori' design provided?</b><br/>The research question and inclusion criteria should be established before the conduct of the review.</p>                                                                                                                                                                                                           |     |    |   |     |
| <p><b>2. Was there duplicate study selection and data extraction?</b><br/>Should be at least two independent data extractors and a consensus procedure</p>                                                                                                                                                                                                             |     |    |   |     |
| <p><b>3. Was a comprehensive literature search performed?</b><br/>At least <u>two</u> electronic sources; must include <u>years and databases used</u>.<br/>Key words and/or <u>MESH terms</u>; search <u>strategy</u> should be provided.<br/>Supplemented by consulting current contents, reviews, textbooks, specialized registers, or experts &amp; references</p> |     |    |   |     |
| <p><b>4. Was the status of publication (i.e. grey literature) used as an inclusion criterion?</b><br/>State whether or not they excluded any reports (from the systematic review), based on their publication status, language etc.</p>                                                                                                                                |     |    |   |     |
| <p><b>5. Was a list of studies (included and excluded) provided?</b></p>                                                                                                                                                                                                                                                                                               |     |    |   |     |
| <p><b>6. Were the characteristics of the included studies provided?</b><br/>Table, data from the original studies on the participants, interventions and outcomes. Characteristics analyzed e.g. age, race, sex, relevant socioeconomic data, disease status, duration, severity, or other diseases.</p>                                                               |     |    |   |     |
| <p><b>7. Was the scientific quality of the included studies assessed and documented?</b><br/>'A priori' methods of assessment</p>                                                                                                                                                                                                                                      |     |    |   |     |
| <p><b>8. Was the scientific quality of the included studies used appropriately in formulating conclusions?</b><br/>The results of the methodological rigor and scientific quality should be considered in the analysis and the conclusions of the review, and stated in formulating recommendations</p>                                                                |     |    |   |     |
| <p><b>9. Were the methods used to combine the findings of studies appropriate?</b><br/>For pooled results, assess their homogeneity (i.e. Chi squared test for homogeneity, I<sup>2</sup>). If heterogeneity exists a random effects model should be used and/or the clinical appropriateness of combining should be taken into consideration</p>                      |     |    |   |     |
| <p><b>10. Was the likelihood of publication bias assessed?</b><br/>(e.g., funnel plot, other available tests) and/or statistical tests (e.g., Egger regression test).</p>                                                                                                                                                                                              |     |    |   |     |
| <p><b>11. Was the conflict of interest stated?</b><br/>Potential sources of support should be clearly acknowledged in both the systematic review and the included studies.</p>                                                                                                                                                                                         |     |    |   |     |

Taken from Shea *et al*<sup>2</sup>

## **E6. Excluded systematic reviews**

Twenty-two systematic reviews were excluded following full text assessment for eligibility (n=14, both RCT and non-RCT study designs included, but a synthesis of the findings and quality of the RCTs was not reported separately<sup>3-16</sup>; n=4, design of non-systematic review methodology<sup>17-20</sup>; n=1, non-eligible patient population<sup>21</sup>; n=1, no eligible studies were included and therefore no data were reported<sup>22</sup>; n=1 full-text not available in English<sup>23</sup>; n=1 where the review was superseded by a later version<sup>24</sup>). All but one of these SR pertained to the 'during ICU' phase of the recovery pathway, with one examining rehabilitation interventions post ICU discharge <sup>7</sup>.

The 14 SR excluded for not reporting RCT and non-RCT study designs separately <sup>3-16</sup>, were further examined to determine potential RCTs missing from the overview synthesis as a result of these exclusions. Table E7 presents the individual studies for each of these SR. Twenty-four RCTs were evaluated across these SR, of which 15 (62.5%) overlapped with the current overview (Table E7, highlighted in red). In total, data from 9 RCTs were not encompassed by SR in the current overview, of which 3 would have been ineligible (respiratory therapy rehabilitation intervention <sup>25</sup>, other non-physical rehabilitation intervention examined – ICU follow-up clinic <sup>26</sup> and intensive care diary <sup>27</sup>). To establish whether these non-overlapping RCTs may have influenced the findings from the overview, we reviewed the abstracts for their conclusions (Table E8); the findings from these RCTs were in keeping with those from the main overview.

**Table E8.** Main findings from RCT that did not overlap between included and excluded SR

| <b>RCT</b>                  | <b>Main finding</b>                                                                                                                                                                                                                                                                 |
|-----------------------------|-------------------------------------------------------------------------------------------------------------------------------------------------------------------------------------------------------------------------------------------------------------------------------------|
| Brummel et al <sup>28</sup> | Pilot feasibility study of early physical and cognitive therapy. Cognitive therapy was feasible to deliver as part of early rehabilitation (during ICU admission). Cognitive, functional and health-related quality of life outcomes did not differ between groups at 3m follow-up. |
| Chang et al <sup>29</sup>   | Standing for 5mins with the assistance of a tilt table significantly increased ventilation in critical care patients during and immediately after the intervention                                                                                                                  |
| Chen et al <sup>30</sup>    | Six weeks physical therapy training plus 6 weeks unsupervised maintenance exercise enhanced functional levels and increased survival for patients with prolonged mechanical ventilation compared with those with no such intervention                                               |
| Chen et al <sup>31</sup>    | Subjects with prolonged mechanical ventilation demonstrated significant improvement in pulmonary mechanics and functional status after exercise training                                                                                                                            |
| Denehy et al <sup>32</sup>  | No difference in exercise capacity as 12months post ICU discharge from an exercise programme delivered during the ICU, post ICU and post hospital discharge.                                                                                                                        |
| Meesen et al <sup>33</sup>  | Electrical muscle stimulation delivered during ICU admission significantly attenuated muscle atrophy measured indirectly via circumferential measurements                                                                                                                           |

**Table E7.** Individual RCTs from excluded systematic reviews

| SR →                                    | Adler <i>et al</i> <sup>3</sup> | Casey <i>et al</i> <sup>4</sup> | Hellweg <i>et al</i> <sup>21</sup> | Li <i>et al</i> <sup>6</sup> | Mehlhorn <i>et al</i> <sup>7</sup> | Parry <i>et al</i> <sup>8</sup> | Thomas <i>et al</i> <sup>9</sup> | Williams <i>et al</i> <sup>10</sup> | Ydemann <i>et al</i> <sup>11</sup> | Choi <i>et al</i> <sup>12</sup> | Clini <i>et al</i> <sup>13</sup> | Truong <i>et al</i> <sup>14 #</sup> | Da Silva <i>et al</i> <sup>23</sup> | Castro-Avila <i>et al</i> <sup>16</sup> |
|-----------------------------------------|---------------------------------|---------------------------------|------------------------------------|------------------------------|------------------------------------|---------------------------------|----------------------------------|-------------------------------------|------------------------------------|---------------------------------|----------------------------------|-------------------------------------|-------------------------------------|-----------------------------------------|
| RCT ↓                                   |                                 |                                 |                                    |                              |                                    |                                 |                                  |                                     |                                    |                                 |                                  |                                     |                                     |                                         |
| Bouletreau <i>et al</i> <sup>34 #</sup> |                                 |                                 |                                    |                              |                                    | *                               |                                  |                                     |                                    |                                 |                                  |                                     |                                     |                                         |
| Brummel <i>et al</i> <sup>28</sup>      |                                 |                                 |                                    |                              |                                    |                                 |                                  |                                     |                                    |                                 |                                  |                                     |                                     | *                                       |
| Burtin <i>et al</i> <sup>35</sup>       | *                               | *                               |                                    | *                            |                                    |                                 |                                  |                                     | *                                  |                                 |                                  |                                     | *                                   | *                                       |
| Caruso <i>et al</i> <sup>25</sup>       |                                 |                                 |                                    |                              |                                    |                                 |                                  |                                     |                                    | *                               |                                  |                                     |                                     |                                         |
| Chang <i>et al</i> <sup>29</sup>        |                                 |                                 |                                    | *                            |                                    |                                 |                                  |                                     |                                    |                                 |                                  |                                     |                                     |                                         |
| Chen <i>et al</i> <sup>30</sup>         |                                 |                                 |                                    | *                            |                                    |                                 |                                  |                                     |                                    |                                 |                                  |                                     |                                     |                                         |
| Chen <i>et al</i> <sup>31</sup>         |                                 |                                 |                                    | *                            |                                    |                                 |                                  |                                     |                                    |                                 |                                  |                                     |                                     |                                         |
| Chiang <i>et al</i> <sup>36</sup>       |                                 | *                               |                                    | *                            |                                    |                                 | *                                |                                     | *                                  | *                               |                                  |                                     | *                                   |                                         |
| Cuthbertson <i>et al</i> <sup>26</sup>  |                                 |                                 |                                    |                              | *                                  |                                 |                                  |                                     |                                    |                                 |                                  |                                     |                                     |                                         |
| Denehy <i>et al</i> <sup>32</sup>       |                                 |                                 |                                    |                              |                                    |                                 |                                  |                                     |                                    |                                 |                                  |                                     |                                     | *                                       |
| Elliott <i>et al</i> <sup>37</sup>      |                                 |                                 |                                    |                              | *                                  |                                 |                                  |                                     |                                    |                                 |                                  |                                     |                                     |                                         |
| Gerovasili <i>et al</i> <sup>38</sup>   |                                 |                                 |                                    |                              |                                    | *                               |                                  | *                                   |                                    |                                 |                                  |                                     |                                     |                                         |
| Gruther <i>et al</i> <sup>39</sup>      |                                 |                                 |                                    |                              |                                    | *                               |                                  | *                                   |                                    |                                 |                                  |                                     |                                     |                                         |
| Jones <i>et al</i> <sup>27</sup>        |                                 |                                 |                                    |                              | *                                  |                                 |                                  |                                     |                                    |                                 |                                  |                                     |                                     |                                         |
| Karatzanos <i>et al</i> <sup>40</sup>   |                                 |                                 |                                    |                              |                                    | *                               |                                  |                                     |                                    |                                 |                                  |                                     |                                     |                                         |
| Meesen <i>et al</i> <sup>33</sup>       |                                 |                                 |                                    |                              |                                    | *                               |                                  |                                     |                                    |                                 |                                  |                                     |                                     |                                         |
| Nava <i>et al</i> <sup>41</sup>         |                                 | *                               |                                    | *                            |                                    |                                 | *                                |                                     | *                                  | *                               | *                                |                                     | *                                   | *                                       |
| Porta <i>et al</i> <sup>42</sup>        |                                 |                                 |                                    | *                            |                                    |                                 |                                  |                                     | *                                  | *                               |                                  |                                     | *                                   |                                         |
| Poulsen <i>et al</i> <sup>43</sup>      |                                 |                                 |                                    |                              |                                    | *                               |                                  |                                     |                                    |                                 |                                  |                                     |                                     |                                         |
| Rodriguez <i>et al</i> <sup>44</sup>    |                                 |                                 |                                    |                              |                                    | *                               |                                  |                                     |                                    |                                 |                                  |                                     |                                     |                                         |
| Routsis <i>et al</i> <sup>45 #</sup>    |                                 |                                 |                                    |                              |                                    | *                               |                                  |                                     | *                                  |                                 |                                  |                                     |                                     | *                                       |
| Salisbury <i>et al</i> <sup>46</sup>    |                                 |                                 |                                    |                              | *                                  |                                 |                                  |                                     |                                    |                                 |                                  |                                     |                                     |                                         |
| Schweickert <i>et al</i> <sup>47</sup>  | *                               | *                               | *                                  | *                            |                                    |                                 |                                  |                                     | *                                  |                                 |                                  |                                     |                                     | *                                       |
| Zanotti <i>et al</i> <sup>48</sup>      |                                 | *                               |                                    |                              |                                    |                                 | *                                |                                     | X                                  | *                               | X                                |                                     | *                                   |                                         |

#No RCTs reported in Truong *et al*. #Indicates parallel paper to accompany Schweickert *et al*<sup>47</sup> with detailed description of intervention

### **E7. Individual trials reported in included systematic reviews**

A total of 24 relevant individual RCTs were included across all included systematic reviews, ranging between 2<sup>49</sup> and 10<sup>50</sup> overall. Table E9 presents the individual studies for each systematic review. Six RCTs<sup>35 37 42 46 51 52</sup> overlapped across two SR, and two further separate RCTs<sup>45 47</sup> overlapped across three included SR.

**Table E9.** Individual studies reported in included systematic reviews

| Individual study                        | # SR reported in | Systematic review                  |                                    |                                        |                                     |                                   |
|-----------------------------------------|------------------|------------------------------------|------------------------------------|----------------------------------------|-------------------------------------|-----------------------------------|
|                                         |                  | <i>Kayambu et al</i> <sup>50</sup> | <i>Hermans et al</i> <sup>49</sup> | <i>Calvo-Ayala et al</i> <sup>53</sup> | <i>Connolly et al</i> <sup>54</sup> | <i>Wageck et al</i> <sup>55</sup> |
| Batterham <i>et al</i> <sup>56</sup>    | 1                |                                    |                                    |                                        | *                                   |                                   |
| Bouletreau <i>et al</i> <sup>57 a</sup> | 1                |                                    |                                    |                                        |                                     | *                                 |
| Bouletreau <i>et al</i> <sup>34 a</sup> | 1                |                                    |                                    |                                        |                                     | *                                 |
| Burtin <i>et al</i> <sup>35</sup>       | 2                | *                                  |                                    | *                                      |                                     |                                   |
| Chiang <i>et al</i> <sup>36</sup>       | 1                | *                                  |                                    |                                        |                                     |                                   |
| Delaney <i>et al</i> <sup>58</sup>      | 1                | *                                  |                                    |                                        |                                     |                                   |
| Denehy <i>et al</i> <sup>32</sup>       | 1                |                                    |                                    | *                                      |                                     |                                   |
| Elliot <i>et al</i> <sup>37</sup>       | 2                |                                    |                                    | *                                      | *                                   |                                   |
| Gerovasili <i>et al</i> <sup>38</sup>   | 1                |                                    |                                    |                                        |                                     | *                                 |
| Gruther <i>et al</i> <sup>39</sup>      | 1                |                                    |                                    |                                        |                                     | *                                 |
| Jackson <i>et al</i> <sup>51</sup>      | 2                |                                    |                                    | *                                      | *                                   |                                   |
| Jones <i>et al</i> <sup>52</sup>        | 2                |                                    |                                    | *                                      | *                                   |                                   |
| Karatzanos <i>et al</i> <sup>40</sup>   | 1                |                                    |                                    |                                        |                                     | *                                 |
| Muehling <i>et al</i> <sup>59</sup>     | 1                | *                                  |                                    |                                        |                                     |                                   |
| Muehling <i>et al</i> <sup>60</sup>     | 1                | *                                  |                                    |                                        |                                     |                                   |
| Nava <i>et al</i> <sup>41</sup>         | 1                | *                                  |                                    |                                        |                                     |                                   |
| Porta <i>et al</i> <sup>42</sup>        | 2                | *                                  |                                    |                                        | *                                   |                                   |
| Poulsen <i>et al</i> <sup>43</sup>      | 1                |                                    |                                    |                                        |                                     | *                                 |
| Rodriguez <i>et al</i> <sup>44</sup>    | 1                |                                    |                                    |                                        |                                     | *                                 |
| Routsi <i>et al</i> <sup>45</sup>       | 3                | *                                  | *                                  |                                        |                                     | *                                 |
| Salisbury <i>et al</i> <sup>46</sup>    | 2                |                                    |                                    | *                                      | *                                   |                                   |
| Schweickert <i>et al</i> <sup>47</sup>  | 3                | *                                  | *                                  | *                                      |                                     |                                   |
| Velmahos <i>et al</i> <sup>61</sup>     | 1                |                                    |                                    |                                        |                                     | *                                 |
| Zanotti <i>et al</i> <sup>48</sup>      | 1                | *                                  |                                    |                                        |                                     |                                   |
| <b>TOTAL</b>                            | -                | 10                                 | 2                                  | 7                                      | 6                                   | 9                                 |

<sup>a</sup>Datasets from the same original study therefore characteristic data only reported once in main text



## **E8. Detail of populations reported in included systematic reviews**

Summary details of individual SR population characteristics are reported in Table E10.

**Table E10.** Description of populations of included systematic reviews

| <b>Author</b>                                 | <b>Population: Description/Diagnosis</b>                                                                                                                                                                                                                                                                                                                                                                                                                                                                                                                                             |
|-----------------------------------------------|--------------------------------------------------------------------------------------------------------------------------------------------------------------------------------------------------------------------------------------------------------------------------------------------------------------------------------------------------------------------------------------------------------------------------------------------------------------------------------------------------------------------------------------------------------------------------------------|
|                                               | <b>Gender</b>                                                                                                                                                                                                                                                                                                                                                                                                                                                                                                                                                                        |
|                                               | <b>Age</b>                                                                                                                                                                                                                                                                                                                                                                                                                                                                                                                                                                           |
| Kayambu <i>et al</i> (2013) <sup>50</sup>     | <p>Critically ill patients with a range of causes of admission to ICU. Measurement and scores of illness severity varied across studies (n=3 reported APACHE II ranging 18-26; n=3 reported ASA III ranging 7-34)</p> <p>Overall % M:F – Control 69:31 vs. Exercise 73:27</p>                                                                                                                                                                                                                                                                                                        |
| Hermans <i>et al</i> (2014) <sup>49</sup>     | <p>Overall mean age – Control 59.3 years vs. Exercise 63.6 years<br/>Pre-morbid independent living status; expected to be ventilated for at least one day.</p> <p>Gender % (M) Intervention 41; Control 58.<br/>Median age Intervention 58; Control 54</p> <p>EMS – only 24 EMS and 28 control participants evaluated. Significant baseline differences between the evaluable group in APACHE II, diagnostic category at admission and presence of co-morbid renal disease.</p> <p>Gender % (M) Intervention 68; Control 68<br/>Average age Intervention 61± 19; Control 58 ± 18</p> |
| Wageck <i>et al</i> (2014) <sup>55</sup>      | <p>No overall summary of participant details. These are reported in the individual study characteristics.<br/>Heterogeneity across studies.</p> <p>No overall summary of gender or age. These are reported in the individual study characteristics.</p>                                                                                                                                                                                                                                                                                                                              |
| Calvo-Ayala <i>et al</i> (2013) <sup>53</sup> | <p>Broad distribution of adult ICU patients evidenced by the variations in the mean APACHE (Acute Physiology and Chronic Health Evaluation) II score (range, 9-28)</p> <p>No summary report for gender.</p>                                                                                                                                                                                                                                                                                                                                                                          |
| Connolly <i>et al</i> (2015) <sup>54</sup>    | <p>Mean age of studies' subjects (48-66 years).<br/>Baseline characteristics between the control and intervention groups in included studies were similar. Jackson 2012 and Salisbury 2010 reported some differences.</p> <p>No overall summary of participant details, gender or age.</p>                                                                                                                                                                                                                                                                                           |

*Abbreviations:* APACHE = Acute Physiology and Chronic Health Evaluation. ASA = American Society of Anesthesiologists. EMS = electrical muscle stimulation

## **E9. Interventions evaluated in included systematic reviews**

Systematic reviews included individual RCTs evaluating a range of interventions. Further description of the intervention is reported in Table E11.

**Table E11.** Description of physical rehabilitation interventions reported in included systematic reviews

| <b>Author</b>                                   | <b>SR physical rehabilitation criteria</b>                                                                                                                                                                                                                       | <b>Interventions reported in review studies</b>                                                                      |
|-------------------------------------------------|------------------------------------------------------------------------------------------------------------------------------------------------------------------------------------------------------------------------------------------------------------------|----------------------------------------------------------------------------------------------------------------------|
| Kayambu <i>et al</i> (2013) <sup>50</sup>       | Physical therapy defined as<br>- Positioning; Stretching; EMS; ROM<br>exercise; Resistive exercises;<br>Ergometry; Walking; Splinting;<br>Mobilization activities; Aerobic<br>training                                                                           | EMS<br>Early mobilisation with functional<br>activities<br>Limb strengthening<br>Respiratory techniques<br>Ergometry |
| Hermans <i>et al</i> (2014) <sup>49 a</sup>     | Physiotherapy, EMS and rehabilitation<br>programmes                                                                                                                                                                                                              | Early physical therapy<br>EMS                                                                                        |
| Wageck <i>et al</i> (2014) <sup>55</sup>        | NMES                                                                                                                                                                                                                                                             | -                                                                                                                    |
| Calvo-Ayala <i>et al</i> (2013) <sup>53 b</sup> | Exercise/physical therapy                                                                                                                                                                                                                                        | Cycle ergometry<br>Intensive rehabilitation protocol<br>Early mobilisation<br>Aerobic training<br>Strength training  |
| Connolly <i>et al</i> (2015) <sup>54 c</sup>    | Exercise rehabilitation or training,<br>including any structured or taught<br>programmes with the aim of improving<br>functional ability and quality of life.<br>Interventions focusing solely on<br>respiratory or inspiratory muscle training<br>were excluded | Aerobic training<br>Strength training<br>Cycle ergometry                                                             |

*Abbreviations:* EMS = electrical muscle stimulation. ROM = range of motion. LOS = length of stay. CIP = critical illness polyneuropathy. CIM = critical illness myopathy.

*Comments:* <sup>a</sup>Aim of review to evaluate effectiveness of any form of intervention reported to reduce risk of CIP/CIM. Review also included non-physical rehabilitation interventions e.g. nutritional interventions, antioxidant therapy, hormone therapy, intravenous immunoglobulin. <sup>b</sup>Aim of review to identify therapies effective in improving long-term physical function. Review also included non-physical rehabilitation interventions e.g. nutrition therapy, insulin therapy, nurse-led follow-up, spontaneous awakening and breathing trials, sedation holds, early tracheostomy. <sup>c</sup>Some interventions included other components including patient manuals, or cognitive therapy

### **E10. Assessment of methodological quality of included systematic reviews**

All included systematic reviews underwent assessment using the PRISMA checklist<sup>1</sup> and AMSTAR tool<sup>62</sup>. Further details on the breakdown of PRISMA and AMSTAR scores are reported in Tables E12 and E13.

**Table E12.** Breakdown of PRISMA scores for individual systematic reviews

| <b>Author</b>                          | <b>Y</b> | <b>N</b> | <b>Partial</b> | <b>Not Applicable</b> | <b>Total</b> |
|----------------------------------------|----------|----------|----------------|-----------------------|--------------|
| Kayambu <i>et al</i> <sup>50</sup>     | 14       | 5        | 6              | 2                     | 17           |
| Hermans <i>et al</i> <sup>49</sup>     | 25       | 1        | 0              | 1                     | 25           |
| Wageck <i>et al</i> <sup>55</sup>      | 15       | 5        | 4              | 3                     | 17           |
| Calvo-Ayala <i>et al</i> <sup>53</sup> | 14       | 5        | 4              | 4                     | 16           |
| Connolly <i>et al</i> <sup>54</sup>    | 25       | 0        | 0              | 2                     | 25           |

**Table E13.** Breakdown of AMSTAR scores for individual systematic reviews

| <b>Author</b>                          | <b>Y</b> | <b>N</b> | <b>Partial</b> | <b>Not Applicable</b> | <b>Total</b> |
|----------------------------------------|----------|----------|----------------|-----------------------|--------------|
| Kayambu <i>et al</i> <sup>50</sup>     | 6        | 5        | 0              | 0                     | 6            |
| Hermans <i>et al</i> <sup>49</sup>     | 10       | 1        | 0              | 0                     | 10           |
| Wageck <i>et al</i> <sup>55</sup>      | 6        | 4        | 1              | 0                     | 6.5          |
| Calvo-Ayala <i>et al</i> <sup>53</sup> | 7        | 3        | 0              | 1                     | 7            |
| Connolly <i>et al</i> <sup>54</sup>    | 8        | 1        | 0              | 2                     | 8            |

### **E11. Main findings and conclusions from included systematic reviews**

The main findings and conclusions from included systematic reviews are reported in Table E14.

**Table E14.** Main findings and conclusions from included systematic reviews

| Author (year)                                                                                | Outcome                     | Finding                                                                                                                                                           | Author conclusion                                                                                                                                                       |
|----------------------------------------------------------------------------------------------|-----------------------------|-------------------------------------------------------------------------------------------------------------------------------------------------------------------|-------------------------------------------------------------------------------------------------------------------------------------------------------------------------|
| **Kayambu <i>et al</i> (2013) <sup>50</sup><br><br>SR included meta-analysis                 | Peripheral muscle strength  | MRC score: Small positive effect ( <sup>d</sup> pooled Hedges g =0.27, 95%CI 0.02, 0.52, n=2 studies, n=244 patients)<br>Handgrip strength: No significant effect | ICU physical therapy reduces ICU and hospital LOS, increases VFD, improves muscle strength, physical function and HRQL. No mortality benefit.                           |
|                                                                                              | Respiratory muscle strength | Moderate positive effect (g = 0.51, 95%CI 0.12, 0.89, 2 studies, n=105 patients)                                                                                  |                                                                                                                                                                         |
|                                                                                              | Physical Function           | Small positive effect (g=0.46, 95%CI 0.13, 0.78, n=2 studies, n=143 patients)                                                                                     |                                                                                                                                                                         |
|                                                                                              | VFD                         | Small positive effect (g=0.38, 95%CI 0.16, 0.59, n=3 studies, n=334 patients)                                                                                     |                                                                                                                                                                         |
|                                                                                              | HRQL                        | Small positive effect (g=0.40, 95%CI 0.08, 0.71, n=2 studies, n=154 patients)                                                                                     |                                                                                                                                                                         |
|                                                                                              | ICU LOS                     | Small positive effect (g=-0.34, 95%CI -0.51, -0.18, n=6 studies, n=597 patients)                                                                                  |                                                                                                                                                                         |
|                                                                                              | Hospital LOS                | Small positive effect (g=-0.34, 95%CI -0.53, -0.15, n=5 studies, n=441 patients)                                                                                  |                                                                                                                                                                         |
|                                                                                              | Mortality                   | No significant effect                                                                                                                                             |                                                                                                                                                                         |
|                                                                                              | AE                          | Not reported                                                                                                                                                      |                                                                                                                                                                         |
| ***Hermans <i>et al</i> (2014) <sup>49 a</sup><br><br>SR included meta-analysis <sup>a</sup> | Incidence of CIP/CIM        | Significant difference with early physical therapy at ICU discharge (RR 0.62, 95%CI 0.39, 0.96, n=1 study, n=82 evaluable patients out of 104 recruited)          | Moderate quality evidence suggests potential benefit of early rehabilitation on CIP/CIM accompanied by reduced MV. Very low quality evidence suggests no effect of EMS. |
|                                                                                              |                             | No effect with early physical therapy at hospital discharge                                                                                                       |                                                                                                                                                                         |
|                                                                                              |                             | No effect with EMS                                                                                                                                                |                                                                                                                                                                         |
|                                                                                              | Duration MV                 | Significant reduction (3.4 (2.3-7.3) vs. 6.1 (4.0-9.6)days, no p value reported) with early physical therapy                                                      |                                                                                                                                                                         |
|                                                                                              |                             | No effect with EMS                                                                                                                                                |                                                                                                                                                                         |
|                                                                                              | ICU LOS                     | No effect with early physical therapy or EMS                                                                                                                      |                                                                                                                                                                         |
|                                                                                              | Mortality                   | Not reported for 30d or 180d and no effect on hospital mortality with early                                                                                       |                                                                                                                                                                         |

|                                                   |                              |                                                                                                                                       |                                                                                                                                                                           |
|---------------------------------------------------|------------------------------|---------------------------------------------------------------------------------------------------------------------------------------|---------------------------------------------------------------------------------------------------------------------------------------------------------------------------|
|                                                   |                              | physical therapy                                                                                                                      |                                                                                                                                                                           |
|                                                   |                              | No effect on ICU, and not reported for 30d or 180d mortality with EMS                                                                 |                                                                                                                                                                           |
|                                                   | AE                           | No significant severe AE with early physical therapy, and not evaluated with EMS                                                      |                                                                                                                                                                           |
| **Wageck <i>et al</i> (2014) <sup>55</sup>        | Muscle strength              | MRC score: Positive effect (SMD 0.77, 95%CI 0.13, 1.40, p=0.02, n=3 studies, n=66 patients)                                           | NMES has good results when used to maintain muscle mass and muscle strength of critically ill patients in ICU                                                             |
|                                                   | Muscle structure             | Reduced muscle degradation (waste product elimination, p<0.01, n=2 studies)                                                           |                                                                                                                                                                           |
| SR included meta-analysis <sup>b</sup>            | ICU LOS                      | No effect (n=3 studies)<br>No effect                                                                                                  |                                                                                                                                                                           |
|                                                   | Duration MV                  | No effect                                                                                                                             |                                                                                                                                                                           |
|                                                   | Complications                | No effect on prevention of DVT occurrence                                                                                             |                                                                                                                                                                           |
|                                                   | AE                           | No other AE were reported                                                                                                             |                                                                                                                                                                           |
| **Calvo-Ayala <i>et al</i> (2013) <sup>53 c</sup> | Long-term physical function  | Significant effect with exercise/physical therapy (varied individual results, n=5 studies)<br>No effect (n=2 studies)                 | Only effective intervention in improving long-term PF is early exercise/physical therapy                                                                                  |
| SR did not include meta-analysis                  | AE                           | Not reported                                                                                                                          |                                                                                                                                                                           |
| ***Connolly <i>et al</i> (2015) <sup>54</sup>     | Functional exercise capacity | Significant effect with exercise-based rehabilitation (varied protocols and outcome measures, n=3 studies)<br>No effect (n=3 studies) | Unable to show an overall effect of exercise based interventions on functional exercise capacity or HRQL for an exercise based intervention initiated after ICU discharge |
| SR did not include meta-analysis                  | HRQL                         | No effect                                                                                                                             |                                                                                                                                                                           |
|                                                   | Mortality                    | Mortality reported across studies (n=6) but not formally analysed                                                                     |                                                                                                                                                                           |
|                                                   | AE                           | Minimal AE reported                                                                                                                   |                                                                                                                                                                           |

Notes: \*\*\* denotes high quality AMSTAR rating. \*\* denotes medium quality AMSTAR rating. <sup>a</sup>Data reported from studies included relating to physical rehabilitation interventions; data for other interventions were meta-analysed. <sup>b</sup>Meta-analysis conducted for only one outcome of interest. <sup>c</sup>Data for exercise/physical interventions only. <sup>d</sup>Pooled Hedges g is a quantitative method to establishing the strength of an effect size

Abbreviations: SR = systematic review. MRC = Medical Research Council. VFD = ventilator free days. HRQL = health-related quality of life. ICU = intensive care unit. LOS = length of stay. AE = adverse events. CIP/CIM = critical illness polyneuropathy/myopathy. MV = mechanical ventilation. EMS = electrical muscle stimulation. NMES = neuromuscular electrical stimulation.

## **E12. Application of GRADE assessment to summarise the evidence from included systematic reviews**

During the GRADE process, four items were considered (risk of bias, inconsistency, indirectness and imprecision). The Cochrane Underlying Methodology was then applied with the following criteria: High quality (randomised controlled trials; or double-upgraded observational studies); Moderate quality (downgraded randomised controlled trials; or upgraded observational studies); Low quality (double-downgraded randomised controlled trials; or observational studies); Very Low quality (triple-downgraded randomised controlled trials; or downgraded observational studies; or case series/care reports)<sup>63</sup>.

Tables E15a and E15b present the GRADE data extraction tables for physical therapy and NMES interventions respectively delivered within the ICU.

**Table E15a.** Comparison: Physical Therapy / Rehabilitation; Setting: Within ICU

| Outcome                          | Review author;<br>N studies;<br>N patients                                                   | Risk of bias         | Inconsistency | Indirectness | Imprecision          | Pooled effect<br>(95%CI)          | P      |
|----------------------------------|----------------------------------------------------------------------------------------------|----------------------|---------------|--------------|----------------------|-----------------------------------|--------|
| <b>IMPAIRMENT</b>                |                                                                                              |                      |               |              |                      |                                   |        |
| Peripheral muscle strength       | Kayambu <i>et al</i> <sup>50</sup><br>2<br>244                                               | Serious <sup>1</sup> | Not serious   | Not serious  | Serious <sup>2</sup> | Hedge's g=0.27<br>(0.02, 0.52)    | 0.03   |
| Respiratory muscle strength      | Kayambu <i>et al</i> <sup>50</sup><br>2<br>105                                               | Serious <sup>3</sup> | Not serious   | Not serious  | Serious <sup>4</sup> | Hedge's g=0.51<br>(0.12, 0.89)    | 0.01   |
| CIP/CIM                          | Hermans <i>et al</i> <sup>49</sup><br>1<br>104                                               | Not serious          | N/A           | N/A          | Not serious          | RR 0.62 (0.39,<br>0.96)~          | 0.03   |
| <b>ACTIVITY LIMITATION</b>       |                                                                                              |                      |               |              |                      |                                   |        |
| Physical function <sup>#</sup>   | Kayambu <i>et al</i> <sup>50</sup><br>and Calvo-Ayala <i>et al</i> <sup>53</sup><br>9<br>821 | Serious <sup>5</sup> | Not serious   | Not serious  | Serious <sup>6</sup> | Hedge's g=0.46<br>(0.13, 0.78)    | 0.01   |
| <b>PARTICIPATION RESTRICTION</b> |                                                                                              |                      |               |              |                      |                                   |        |
| Quality of Life                  | Kayambu <i>et al</i> <sup>50</sup><br>2<br>154                                               | Not serious          | Not serious   | Not serious  | Not serious          | Hedge's g=0.40<br>(0.08, 0.71)    | 0.01   |
| <b>HEALTHCARE UTILISATION</b>    |                                                                                              |                      |               |              |                      |                                   |        |
| VFD                              | Kayambu <i>et al</i> <sup>50</sup><br>3<br>334                                               | Not serious          | Not serious   | Not serious  | Serious <sup>8</sup> | Hedge's g=0.38<br>(0.16, 0.59)    | <0.001 |
| ICU LOS                          | Kayambu <i>et al</i> <sup>50</sup><br>6<br>597                                               | Not serious          | Not serious   | Not serious  | Not serious          | Hedge's g=-0.34<br>(-0.51, -0.18) | <0.001 |
| Hospital LOS                     | Kayambu <i>et al</i> <sup>50</sup>                                                           | Not serious          | Not serious   | Not serious  | Not serious          | Hedge's g=-0.34                   | <0.001 |

|                    |                                     |             |             |             |             |                                                                 |              |
|--------------------|-------------------------------------|-------------|-------------|-------------|-------------|-----------------------------------------------------------------|--------------|
|                    | Hermans <i>et al</i> <sup>49*</sup> |             |             |             |             | (-0.53, -0.15)                                                  |              |
|                    | 5                                   |             |             |             |             |                                                                 |              |
|                    | 441                                 |             |             |             |             |                                                                 |              |
| Hospital mortality | Kayambu <i>et al</i> <sup>50</sup>  | Not serious | Not serious | Not serious | Not serious | OR 1.0. (0.54, 1.85)                                            | 1.0          |
|                    | Hermans <i>et al</i> <sup>49*</sup> |             |             |             |             |                                                                 |              |
|                    | 3                                   |             |             |             |             |                                                                 |              |
|                    | 274                                 |             |             |             |             |                                                                 |              |
| Duration of MV     | Hermans <i>et al</i> <sup>49</sup>  | Not serious | Not serious | Not serious | Not serious | Median (IQR) 3.4 days (2.3 to 7.3) versus 6.1 days (4.0 to 9.6) | Not reported |
|                    | 1                                   |             |             |             |             |                                                                 |              |
|                    | Not reported                        |             |             |             |             |                                                                 |              |

Notes: # GRADE assessment based only on data from Kayambu *et al*<sup>50</sup> as no pooled data reported in Calvo-Ayala *et al*<sup>53</sup>. \* Outcome from same RCT reported in both reviews. ~ data derived from 82 evaluable patients out of 104 recruited.

1 50% no random allocation; 50% no concealed allocation; 50% no blinded assessors; 50% not reported measures of key outcomes >85% patients

2 Measured at different endpoints

3 50% no concealed allocation; 50% no blinded assessors; 50% not reported measures of key outcomes >85% patients; 100% no ITT

4 Unclear endpoints in 1 study

5 50% no allocation concealment; 50% not reported measures of key outcomes >85% patients; 50% no ITT

6 Measured at different endpoints

7 Risk of bias scores not reported in detail

8 Measured at different endpoints

*Abbreviations:* WHO = World Health Organisation. CIP/CIM = critical illness polyneuropathy/myopathy. VFD = ventilator-free days. ICU = intensive care unit. LOS = length of stay. MV = mechanical ventilation



**Table E15b.** Comparison: NMES; Setting: Within ICU

| Outcome                           | Review/s;<br>N studies: N<br>patients                 | Risk of bias         | Inconsistency        | Indirectness         | Imprecision          | Pooled effect<br>(95%CI)   | P    |
|-----------------------------------|-------------------------------------------------------|----------------------|----------------------|----------------------|----------------------|----------------------------|------|
| <b>IMPAIRMENT</b>                 |                                                       |                      |                      |                      |                      |                            |      |
| Muscle strength                   | Wagek <i>et al</i> <sup>55</sup><br>3<br>66           | Serious <sup>1</sup> | Serious <sup>2</sup> | Not serious          | Serious <sup>2</sup> | SMD 0.77, ( 0.13,<br>1.40) | 0.02 |
| Muscle structure                  | Wagek <i>et al</i> <sup>55</sup><br>6                 | Not serious          | Serious <sup>3</sup> | Serious <sup>4</sup> | Not possible         | Not possible to<br>pool    | N/A  |
| CIP/CIM                           | Hermans <i>et al</i> <sup>49</sup><br>1<br>52         | Serious <sup>5</sup> | N/A                  | Serious <sup>6</sup> | Not serious          | RR 0.32 (0.10,<br>1.01)    | 0.05 |
| <b>HEALTHCARE<br/>UTILISATION</b> |                                                       |                      |                      |                      |                      |                            |      |
| ICU LOS                           | Wagek <i>et al</i> <sup>55</sup><br>1<br>Not reported | Serious <sup>7</sup> | N/A                  | N/A                  | N/A                  | Not reported               | NS   |
| Duration of MV                    | Wagek <i>et al</i> <sup>55</sup><br>1<br>Not reported | Serious <sup>7</sup> | N/A                  | N/A                  | N/A                  | Not reported               | NS   |

1 Review reported 50% no concealed allocation; 50% no blinded assessors; 50% not reported measures of key outcomes >85% patients; 50% no ITT

2 Mean difference in 1 study does not fall within the 95% CI of the other

3 3 studies reported an effect and 3 did not

4 Different outcome measures used at different time points

5 High ROB reported by review for this study vis-s-vis randomisation, concealment, incomplete outcome data & selective reporting

6 Not all participants were evaluable

7 Review reported no concealed allocation; no blinded assessors; not reported measures of key outcomes >85% patients

*Abbreviations:* CIP/CIM = critical illness polyneuropathy/myopathy. ICU = intensive care unit. LOS = length of stay. MV = mechanical ventilation

## References

1. Liberati A, Altman DG, Tetzlaff J, et al. The PRISMA statement for reporting systematic reviews and meta-analyses of studies that evaluate healthcare interventions: explanation and elaboration. *BMJ* 2009;**339**:b2700.
2. Shea BJ, Hamel C, Wells GA, et al. AMSTAR is a reliable and valid measurement tool to assess the methodological quality of systematic reviews. *J Clin Epidemiol* 2009;**62**(10):1013-20.
3. Adler J, Malone D. Early mobilization in the intensive care unit: a systematic review. *Cardiopulmonary Physical Therapy Journal* 2012;**23**(1):5-13.
4. Casey CM. The study of activity in older ICU patients: an integrative review. *J Gerontol Nurs* 2013;**39**(8):12-25; quiz 26-7.
5. Hellweg S. Effectiveness of physiotherapy and occupational therapy after traumatic brain injury in the intensive care unit. *Critical Care Research & Practice* 2012;**2012**:768456.
6. Li Z, Peng X, Zhu B, et al. Active mobilization for mechanically ventilated patients: a systematic review. *Arch Phys Med Rehabil* 2013;**94**(3):551-61.
7. Mehlhorn J, Freytag A, Schmidt K, et al. Rehabilitation Interventions for Postintensive Care Syndrome: A Systematic Review\*. *Crit Care Med* 2014;**42**(5):1263-71.
8. Parry S, Berney S, Granger C, et al. Electrical Muscle Stimulation in the Intensive Care Setting: A Systematic Review. *Crit Care Med* 2013;**41**(10):2406-18.
9. Thomas AJ. Exercise intervention in the critical care unit what is the evidence? *Physical Therapy Reviews* 2009;**14**:50-59.
10. Williams N, Flynn M. A review of the efficacy of neuromuscular electrical stimulation in critically ill patients. *Physiotherapy Theory & Practice* 2014;**30**(1):6-11.
11. Ydemann M, Eddelien HS, Lauritsen AO. Treatment of critical illness polyneuropathy and/or myopathy - a systematic review. *Danish Medical Journal* 2012;**59**(10):A4511.
12. Choi J, Tasota FJ, Hoffman LA. Mobility interventions to improve outcomes in patients undergoing prolonged mechanical ventilation: a review of the literature. *Biological Research for Nursing* 2008;**10**(1):21-33.
13. Clini E, Ambrosino N. Early physiotherapy in the respiratory intensive care unit. *Respir Med* 2005;**99**(9):1096-104.
14. Truong A, Fan E, Brower R, et al. Bench-to-bedside review: Mobilizing patients in the intensive care unit - from pathophysiology to clinical trials. *Critical Care* 2009;**13**(4):216.
15. da Silva A, Maynard K, da Cruz M. Effects of motor physical therapy in critically ill patients: Literature review. *Rev Bras Ter Intensiva* 2010;**22**:85-91.
16. Castro-Avila A, Seron P, Fan E, et al. Effect of Early Rehabilitation during Intensive Care Unit Stay on Functional Status: Systematic Review and Meta-Analysis. *Plos ONE* 2015;**10**:e0130722.
17. O'Connor ED, Walsham J. Should we mobilise critically ill patients? A review. *Critical Care & Resuscitation* 2009;**11**(4):290-300.
18. Stiller K. Physiotherapy in intensive care: towards an evidence-based practice. *Chest* 2000;**118**(6):1801-13.
19. Thomas AJ. Physiotherapy led early rehabilitation of the patient with critical illness. *Physical Therapy Reviews* 2011;**16**:46-57.
20. Stiller K. Physiotherapy in intensive care: An updated systematic review. *Chest* 2013;**144**(3):825-47.
21. Hellweg S, Johannes S. Physiotherapy after traumatic brain injury: a systematic review of the literature. *Brain Inj* 2008;**22**(5):365-73.
22. Mehrholz J, Pohl M, Kugler J, et al. Physical rehabilitation for critical illness myopathy and neuropathy. *Cochrane Database of Systematic Reviews* 2015(3):CD010942.

23. da Silvae Azevedo P, Pereira Gomes B. Effects of early mobilisation in the functional rehabilitation of critically ill patients: a systematic review. *Revista de Enfermagem Referencia* 2015;**110**:129-38.
24. Hermans G, De Jonghe B, Bruyninckx F, et al. Interventions for preventing critical illness polyneuropathy and critical illness myopathy. *Cochrane Database Syst Rev* 2009(1):CD006832.
25. Caruso P, Denari SD, Ruiz SA, et al. Inspiratory muscle training is ineffective in mechanically ventilated critically ill patients. *Clinics (Sao Paulo, Brazil)* 2005;**60**(6):479-84.
26. Cuthbertson BH, Rattray J, Campbell MK, et al. The PRaCTICaL study of nurse led, intensive care follow-up programmes for improving long term outcomes from critical illness: a pragmatic randomised controlled trial. *BMJ* 2009;**339**:b3723.
27. Jones C, Backman C, Capuzzo M, et al. Intensive care diaries reduce new onset post traumatic stress disorder following critical illness: A randomised, controlled trial. *Critical Care* 2010;**14**:R168.
28. Brummel NE, Girard TD, Ely EW, et al. Feasibility and safety of early combined cognitive and physical therapy for critically ill medical and surgical patients: the Activity and Cognitive Therapy in ICU (ACT-ICU) trial. *Intensive Care Med* 2014;**40**(3):370-9.
29. Chang AT, Boots RJ, Hodges PW, et al. Standing with the assistance of a tilt table improves minute ventilation in chronic critically ill patients. *Arch Phys Med Rehabil* 2004;**85**(12):1972-76.
30. Chen S, Su CL, Wu YT, et al. Physical training is beneficial to functional status and survival in patients with prolonged mechanical ventilation. *J Formos Med Assoc* 2011;**110**(9):572-9.
31. Chen YH, Lin HL, Hsiao HF, et al. Effects of exercise training on pulmonary mechanics and functional status in patients with prolonged mechanical ventilation. *Respir Care* 2012;**57**(5):727-34.
32. Denehy L, Skinner E, Edbrooke L, et al. Exercise rehabilitation for patients with critical illness: a randomized controlled trial with 12 months of follow-up. *Critical Care* 2013;**17**(4):R156.
33. Meesen R, Dendale P, K C, et al. Neuromuscular electrical stimulation as a possible means to prevent muscle tissue wasting in artificially ventilated and sedated patients in the intensive care unit: A pilot study. *Neuromodulation* 2010;**13**:315-20.
34. Bouletreau P, Patricot MC, Saudin F, et al. Effects of intermittent electrical stimulations on muscle catabolism in intensive care patients. *Jpen: Journal of Parenteral & Enteral Nutrition* 1987;**11**(6):552-5.
35. Burtin C, Clerckx B, Robbeets C, et al. Early exercise in critically ill patients enhances short-term functional recovery. *Crit Care Med* 2009;**37**(9):2499-505.
36. Chiang LL, Wang LY, Wu CP, et al. Effects of physical training on functional status in patients with prolonged mechanical ventilation. *Phys Ther* 2006;**86**(9):1271-81.
37. Elliott D, McKinley S, Alison J, et al. Health-related quality of life and physical recovery after a critical illness: a multi-centre randomised controlled trial of a home-based physical rehabilitation program. *Critical Care* 2011;**15**(3):R142.
38. Gerovasili V, Stefanidis K, Vitzilaios K, et al. Electrical muscle stimulation preserves the muscle mass of critically ill patients: a randomized study. *Critical Care* 2009;**13**(5):R161.
39. Gruther W, Kainberger F, Fialka-Moser V, et al. Effects of Neuromuscular Electrical Stimulation on Muscle Layer Thickness of Knee Extensor Muscles in Intensive Care Unit Patients: a Pilot Study. *Journal of Rehabilitation Medicine* 2010;**42**:593-97.
40. Karatzanos L, Gerovasili V, Zervakis D, et al. Electrical muscle stimulation: A form of exercise to improve muscle strength in critically ill patients. *Intensive Care Med* 2010;**36**:S389.
41. Nava S. Rehabilitation of patients admitted to a respiratory intensive care unit. *Arch Phys Med Rehabil* 1998;**79**(7):849-54.
42. Porta R, Vitacca M, Gilè LS, et al. Supported arm training in patients recently weaned from mechanical ventilation. *Chest* 2005;**128**(4):2511-20.

43. Poulsen JB, Moller K, Jensen C, et al. Effect of transcutaneous electrical muscle stimulation on muscle volume in patients with septic shock. *Crit Care Med* 2011;**39**:456-61.
44. Rodriguez PO, Setten M, Maskin LP, et al. Muscle weakness in septic patients requiring mechanical ventilation: Protective effect of transcutaneous neuromuscular electrical stimulation. *J Crit Care* 2012;**27**(3):319.e1-8.
45. Routsis C, Gerovasili V, Vasileiadis I, et al. Electrical muscle stimulation prevents critical illness polyneuromyopathy: a randomized parallel intervention trial. *Critical Care* 2010;**14**(2):R74.
46. Salisbury L, Merriweather J, Walsh T. The development and feasibility of a ward-based physiotherapy and nutritional rehabilitation package for people experiencing critical illness. *Clin Rehabil* 2010;**24**:489-500.
47. Schweickert WD, Pohlman MC, Pohlman AS, et al. Early physical and occupational therapy in mechanically ventilated, critically ill patients: a randomised controlled trial. *Lancet* 2009;**373**(9678):1874-82.
48. Zanotti E, Felicetti G, Maini M, et al. Peripheral muscle strength training in bed-bound patients with COPD receiving mechanical ventilation: Effect of electrical stimulation. *Chest* 2003;**124**(1):292-96.
49. Hermans G, De Jonghe B, Bruyninckx F, et al. Interventions for preventing critical illness polyneuropathy and critical illness myopathy.[Update of Cochrane Database Syst Rev. 2009;(1):CD006832; PMID: 19160304]. *Cochrane Database of Systematic Reviews* 2014;**1**:CD006832.
50. Kayambu G, Boots R, Paratz J. Physical Therapy for the Critically Ill in the ICU: A Systematic Review and Meta-Analysis. *Crit Care Med* 2013;**41**(6):1543-54
51. Jackson J, Ely EW, Morey M, et al. Cognitive and physical rehabilitation of intensive care unit survivors: Results of the RETURN randomized controlled pilot investigation. *Crit Care Med* 2012;**40**(4):1088-97.
52. Jones C, Skirrow P, Griffiths R, et al. Rehabilitation after critical illness: a randomized, controlled trial. *Crit Care Med* 2003;**31**:2456 - 61.
53. Calvo-Ayala E, Khan BA, Farber MO, et al. Interventions to improve the physical function of icu survivors: A systematic review. *Chest* 2013;**144**(5):1469-80.
54. Connolly B, Salisbury L, O'Neill B, et al. Exercise rehabilitation for recovery from critical illness following intensive care unit discharge. *Cochrane Database of Systematic Reviews* 2015(5):Art. No.: CD008632.
55. Wageck B, Nunes GS, Silva FL, et al. Application and effects of neuromuscular electrical stimulation in critically ill patients: Systematic review. *Med* 2014;**38**(7):444-54.
56. Batterham AM, Bonner S, Wright J, et al. Effect of supervised aerobic exercise rehabilitation on physical fitness and quality-of-life in survivors of critical illness: an exploratory minimized controlled trial (PIX study). *Br J Anaesth* 2014;**113**(1):130-37.
57. Bouletreau P, Patricot MC, Saudin F, et al. Effets des stimulations musculaires intermittentes sur le catabolisme musculaire des malades immobilises en reanimation. *Ann Fr Anesth Reanim* 1986;**5**:376-80.
58. Delaney C, Zutshi M, Senagore A, et al. Prospective, Randomized, Controlled Trial Between a Pathway of Controlled Rehabilitation With Early Ambulation and Diet and Traditional Postoperative Care After Laparotomy and Intestinal Resection. *Dis Colon Rectum* 2003;**46**(7):851-59.
59. Muehling B, Halter G, Lang G, et al. Prospective randomized controlled trial to evaluate "fast-track elective open infrarenal aneurysm repair. *Langenbecks Arch Surg* 2008;**393**:281-87.
60. Muehling B, Schelzig H, Steffen P, et al. A Prospective Randomized Trial Comparing Traditional and Fast-Track Patient Care in Elective Open Infrarenal Aneurysm Repair. *World J Surg* 2009;**33**:577-85.

61. Velmahos G, Petrone P, Chan L, et al. Electrostimulation for the prevention of deep venous thrombosis in patients with major trauma: prospective randomized study. *Surgery* 2005;**137**:493-8.
62. Shea B, Grimshaw J, Wells G, et al. Development of AMSTAR: a measurement tool to assess the methodological quality of systematic reviews. *BMC Medical Research Methodology* 2007;**7**(1):10.
63. Higgins J, Green SE. *Cochrane Handbook for Systematic Reviews of Interventions* Version 5.1.0 [updated March 2011]. . The Cochrane Collaboration, 2011 Available from [www.cochrane-handbook.org](http://www.cochrane-handbook.org) 2011.
